# Supplementary material for: Does Acute Caffeine Supplementation Improve Physical Performance in Female Team-Sport Athletes? Evidence from a Systematic Review and Meta-Analysis
Source: MDPI journal article supplement (doi:10.3390/nu13103663), 2021-10-19
Supplement: s1 [file s1]

**Supplementary Table S1. Search strategy**

|                      | Pubmed                                                                                                                                                                                                                                                                                                                                                                                                                                                                                                                                                                                                                                                                                                                                                                                                 | SportDiscuss                                                                                                                                                                                                                                                                                                                                                                                                                                                                                                | SCOPUS                                                                                                                                                                                                                                                   |
|----------------------|--------------------------------------------------------------------------------------------------------------------------------------------------------------------------------------------------------------------------------------------------------------------------------------------------------------------------------------------------------------------------------------------------------------------------------------------------------------------------------------------------------------------------------------------------------------------------------------------------------------------------------------------------------------------------------------------------------------------------------------------------------------------------------------------------------|-------------------------------------------------------------------------------------------------------------------------------------------------------------------------------------------------------------------------------------------------------------------------------------------------------------------------------------------------------------------------------------------------------------------------------------------------------------------------------------------------------------|----------------------------------------------------------------------------------------------------------------------------------------------------------------------------------------------------------------------------------------------------------|
| Caffeine keywords    | (((((("caffeine"[MeSH Terms] OR "caffeine"[All Fields]) OR ("energy drinks"[MeSH Terms] OR ("energy"[All Fields] AND "drinks"[All Fields]) OR "energy drinks"[All Fields] OR ("energy"[All Fields] AND "drink"[All Fields]) OR "energy drink"[All Fields])) OR caffeinated[All Fields]) OR ("tea"[MeSH Terms] OR "tea"[All Fields])) OR ("coffee"[MeSH Terms] OR "coffee"[All Fields]))                                                                                                                                                                                                                                                                                                                                                                                                                | (DE "ENERGY drinks") OR "Energy drinks" OR (DE "CAFFEINE") OR "Caffeine drinks" OR "Caffeinated" OR "Coffee"                                                                                                                                                                                                                                                                                                                                                                                                | "caffeine" OR "energy drinks" OR ("energy" AND "drink") OR "energy drink" OR "caffeinated" OR "tea" OR "coffee"                                                                                                                                          |
|                      | AND                                                                                                                                                                                                                                                                                                                                                                                                                                                                                                                                                                                                                                                                                                                                                                                                    |                                                                                                                                                                                                                                                                                                                                                                                                                                                                                                             |                                                                                                                                                                                                                                                          |
| Team sports keywords | ((((((((((((((team[All Fields] AND ("sports"[MeSH Terms] OR "sports"[All Fields] OR "sport"[All Fields])) OR ("volleyball"[MeSH Terms] OR "volleyball"[All Fields])) OR ("soccer"[MeSH Terms] OR "soccer"[All Fields])) OR ("football"[MeSH Terms] OR "football"[All Fields])) OR ("basketball"[MeSH Terms] OR "basketball"[All Fields])) OR ("hockey"[MeSH Terms] OR "hockey"[All Fields])) OR handball[All Fields]) OR croquet [All Fields]) OR netball[All Fields]) OR "water polo"[All Fields]) OR waterpolo[All Fields]) OR futsal[All Fields]) OR ("football"[MeSH Terms] OR "football"[All Fields] OR "rugby"[All Fields])) OR ("baseball"[MeSH Terms] OR "baseball"[All Fields])) OR floorball[All Fields]) OR ("baseball"[MeSH Terms] OR "baseball"[All Fields] OR "softball"[All Fields]))). | (DE "TEAM sports") OR "TEAM SPORTS" OR (DE "VOLLEYBALL") OR "Volleyball" OR (DE "SOCCER") OR "soccer" OR (DE "FOOTBALL") OR "Football" OR (DE "BASKETBALL") OR "Basketball" OR (DE "HOCKEY") OR "Hockey" OR (DE "HANDBALL") OR "Handball" OR (DE "NETBALL") OR "Netball" OR (DE "WATER polo") OR Waterpolo OR "Water polo" OR (DE "INDOOR soccer") OR "Futsal" OR (DE "RUGBY football") OR "Rugby" OR (DE "BASEBALL") OR "Baseball" OR (DE "INDOOR hockey") OR "floorball" OR (DE "SOFTBALL") OR "Softball" | ("team" AND "sports") OR "team sport" OR "team sports" OR "volleyball" OR "soccer" OR "football" OR "basketball" OR "hockey" OR "handball" OR "netball" OR "water polo" OR "waterpolo" OR "futsal" OR "rugby" OR "baseball" OR "floorball" OR "softball" |
| <b>Results</b>       | <b>217 documents</b>                                                                                                                                                                                                                                                                                                                                                                                                                                                                                                                                                                                                                                                                                                                                                                                   | <b>290 documents</b><br><b>Filter:</b><br><b>"Peer reviewed articles"</b><br><b>115 documents</b>                                                                                                                                                                                                                                                                                                                                                                                                           | <b>328 documents</b><br><b>Filter: Document type:</b><br><b>"Article":</b><br><b>256 documents</b>                                                                                                                                                       |

**Supplementary Table S2. Quality Assessment of included randomized controlled trials (PEDro scores)**

| Author/year                     | Random allocation | Concealed allocation | Similarity at baseline | Subject blinding | Therapist blinding | Assessor blinding | >85% follow-up for ≥1 primary outcome | All participants or ITT analysis | Between-group statistical comparison for ≥1 key outcome | Point measures and variability | PEDro score |
|---------------------------------|-------------------|----------------------|------------------------|------------------|--------------------|-------------------|---------------------------------------|----------------------------------|---------------------------------------------------------|--------------------------------|-------------|
| Astorino TA. et al. 2011        | 1                 | 1                    | 1                      | 1                | 0                  | 0                 | 1                                     | 1                                | 1                                                       | 1                              | 8/10        |
| Del Coso J. et al. 2013         | 1                 | 1                    | 1                      | 1                | 1                  | 1                 | 1                                     | 1                                | 1                                                       | 1                              | 10/10       |
| Lee CL. et al. 2014             | 1                 | 1                    | 1                      | 1                | 1                  | 1                 | 1                                     | 1                                | 1                                                       | 1                              | 10/10       |
| Lara B. et al. 2014             | 1                 | 1                    | 1                      | 1                | 1                  | 1                 | 1                                     | 1                                | 1                                                       | 1                              | 10/10       |
| Buck C. et al. 2015             | 1                 | 1                    | 1                      | 1                | 1                  | 1                 | 1                                     | 1                                | 1                                                       | 1                              | 10/10       |
| Chen HY. et al. 2015            | 1                 | 1                    | 1                      | 1                | 1                  | 1                 | 1                                     | 1                                | 1                                                       | 1                              | 10/10       |
| Mahdavi R. et al. 2015          | 1                 | 1                    | 1                      | 1                | 1                  | 1                 | 1                                     | 1                                | 1                                                       | 1                              | 10/10       |
| Fernández-Campos C. et al. 2015 | 1                 | 1                    | 1                      | 1                | 1                  | 1                 | 1                                     | 0                                | 1                                                       | 1                              | 9/10        |
| Pérez-López A. et al. 2015      | 1                 | 1                    | 1                      | 1                | 1                  | 1                 | 1                                     | 1                                | 1                                                       | 1                              | 10/10       |
| Ali A. et al. 2016              | 1                 | 1                    | 1                      | 1                | 1                  | 1                 | 1                                     | 1                                | 1                                                       | 1                              | 10/10       |
| Ali A. et al. 2016              | 1                 | 1                    | 1                      | 1                | 1                  | 1                 | 1                                     | 1                                | 1                                                       | 1                              | 10/10       |
| Portillo J. et al. 2017         | 1                 | 1                    | 1                      | 1                | 1                  | 1                 | 1                                     | 1                                | 1                                                       | 1                              | 10/10       |
| Puente C. et al. 2017           | 1                 | 1                    | 1                      | 1                | 1                  | 1                 | 1                                     | 1                                | 1                                                       | 1                              | 10/10       |
| Pfeifer DR. et al. 2017         | 1                 | 1                    | 1                      | 1                | 0                  | 0                 | 1                                     | 1                                | 1                                                       | 1                              | 8/10        |
| Stojanovic E, et al. 2019       | 1                 | 1                    | 1                      | 1                | 1                  | 1                 | 1                                     | 1                                | 1                                                       | 1                              | 10/10       |
| Tan ZS. et al. 2020             | 1                 | 1                    | 1                      | 1                | 0                  | 0                 | 1                                     | 1                                | 1                                                       | 1                              | 8/10        |
| Muñoz A. et al. 2020            | 1                 | 1                    | 1                      | 1                | 1                  | 1                 | 1                                     | 1                                | 1                                                       | 1                              | 10/10       |
| Karayigit R. et al. 2021        | 1                 | 1                    | 1                      | 1                | 1                  | 1                 | 1                                     | 1                                | 1                                                       | 1                              | 10/10       |

ITT: intention to treat; PEDro: Physiotherapy Evidence Database.

Tool used: PEDro scale

Each item has been scored as 1 when it is presented and as 0 when it is absented. PEDro score is obtained after summing all items.

**Supplementary Table S3. Quality Assessment of included randomized controlled trials (RoB 2 tool)**

|       |                                 | Risk of bias domains |    |    |    |    |         |
|-------|---------------------------------|----------------------|----|----|----|----|---------|
|       |                                 | D1                   | D2 | D3 | D4 | D5 | Overall |
| Study | Astorino TA. et al. 2011        | +                    | -  | +  | -  | +  | -       |
|       | Del Coso J. et al. 2013         | +                    | +  | +  | +  | +  | +       |
|       | Lee CL. et al. 2014             | +                    | +  | +  | +  | +  | +       |
|       | Lara B. et al. 2014             | +                    | +  | +  | +  | +  | +       |
|       | Buck C. et al. 2015             | +                    | +  | +  | +  | +  | +       |
|       | Chen HY. et al. 2015            | +                    | +  | +  | +  | +  | +       |
|       | Mahdavi R. et al. 2015          | +                    | +  | +  | +  | +  | +       |
|       | Fernández-Campos C. et al. 2015 | +                    | -  | +  | +  | +  | -       |
|       | Pérez-López A. et al. 2015      | +                    | +  | +  | +  | +  | +       |
|       | Ali A. et al. 2016a             | +                    | +  | +  | +  | +  | +       |
|       | Ali A. et al. 2016b             | +                    | +  | +  | +  | +  | +       |
|       | Portillo J. et al. 2017         | +                    | +  | +  | +  | +  | +       |
|       | Puente C. et al. 2017           | +                    | +  | +  | +  | +  | +       |
|       | Pfeifer DR. et al. 2017         | +                    | -  | +  | -  | +  | -       |
|       | Stojanovic E, et al. 2019       | +                    | +  | +  | +  | +  | +       |
|       | Tan ZS. et al. 2020             | +                    | -  | +  | -  | +  | -       |
|       | Muñoz A. et al. 2020            | +                    | +  | +  | +  | +  | +       |
|       | Karayigit R. et al. 2021        | +                    | +  | +  | +  | +  | +       |

Domains:  
D1: Bias arising from the randomization process.  
D2: Bias due to deviations from intended intervention.  
D3: Bias due to missing outcome data.  
D4: Bias in measurement of the outcome.  
D5: Bias in selection of the reported result.

Judgement  
- Some concerns  
+ Low
